# Supplementary material for: A new cis-acting motif is required for the axonal SMN-dependent Anxa2 mRNA localization
Source: PubMed Central journal article supplement — RNA. 2017 Jun;23(6):899–909. doi: 10.1261/rna.056788.116 (PMC5435863; doi:10.1261/rna.056788.116), 2017-06

**A**

Mouse Anxa2  
Gene size: 1374 nt  
QGRS found: 6

```
GCCACGCCGG GCTGCTCCGC TTCAAGGGAG GCTCTCAGCG ATACGTGCC GGCACAGCT TTTTTTCTT CAAAATGCTCT ACTGTCCAG AATCCTGTG 100
CAAGCTCAGC CTGGAGGGTG ATCATTCTAC ACCCCCAAGT GCCTACGGGT CAGTCAAACC CTACACCAAC TTCGATGCTG AGAGGGATGC TCTGAACATT 200
GAGACAGCAG TCAAGACCAA AGGAGTGGAT GAGGTCACCA TTGTCAACAT CCTGACAAAC CGCAGCAATG TGCAGAGGCA GGACATTGCC TTCGCCATC 300
AGAGAAGGAC CAAAAAGGAG CTCCCGTCAG CGCTGAAGTC AGCCTTATCT GGCCACCTGG AGACGGTGAT TTTGGGCCTA TTGAAGACAC CTGCCCAGTA 400
TGATGCTTCG GAACTAAAAG CTTCATGAA GGCCTGGGG ACTGACGAGG ACTCCCTCAT TGAGATCATC TGCTCACGAA CCAACCAGGA GCTGCAAGAG 500
ATCAACAGAG TGTACAAGGA AATGTACAAG ACTGATCTGG AGAAGGACAT CATCTGTGAC ACATCTGGAG ACTTCCGAAA GCTGATGGTC GCCTTGCAA 600
AGGGCAGACC AGCAGAGGAT GGCTCAGTTA TTGACTACGA GCTGATTGAC CAGGATGCCC GGGAGCTCTA TGATGCCGGG GTGAAGAGGA AAGGAACCGA 700
CGTCCCCAAG TGGATCAGCA TCATGACTGA GCGCAGTGTG TGCCACCTCC AGAAAGTGT CGAAAGGTAC AAGAGCTACA GCCTTATGA CATGCTGGAG 800
AGCATCAAGA AAGAGGGTCAA AGGGGACCTG GAGAACGCCT TCCTGAACCT GGTCAGATGC ATCCAGAACA AGCCCTGTA CTCGCTGAC GGCCTGTACG 900
ACTCCATGAA GGCAAGGGG ACTCGAGACA AGGTCCTGAT TAGAATCATG GTCTCTCGCA GTGAAGTGA CATGCTGAA ATCAGATCTG AATTCAAGAG 1000
GAAATATGGC AAGTCCTCT ACTACTACAT CCAGCAAGAC ACCAAGGGTG ACTACCAGAA GGCCTGCTG TACCTGTGG GTGGGGATGA CTGAAGCGCT 1100
CAGCACAGTG GATCACCCAG AAGTGGCTCT ACCTGTGCC CAACCTGGCG TTCTAGAGAC TTCCGCTCC ACTAATGGAC CCCTGAGCTC CTCCTGTGA 1200
GGATGATGAC AGGGCTGCCG ACCCTTTCC CATCTTAGCT GCCTTGCCT GGCTTCTCC TCATTCTCTC CTTTATGCCA AAGAAGTGA CATTCCAGG 1300
AGTGGGGCGT AGCGTCTGTG ACATGAGACA CTTCTCTTA TGACTGTGT CGTGAATAAA CCGTTTTTAC TTTA 1374
```

Human Anxa2  
Gene size: 1471 nt  
QGRS found: 7

```
GCTCAGCATT TGGGACGGCT CTCAGCTCTC GGCGCACGGC CCAGGGTGAA AATGTTGGC ATTAACCTCA CATGAAGTAG GAAATATTTA TATGGATACA 100
AAAGGCACCT GCATGGGATA ATGTCAAATT TCATAGATAC TGCTTTGTGC TTCTTCAA ATGTCTACTG TTCACGAAAT CCTGTGCAAG CTCAGCTTGG 200
AGGGTGATCA CTCTACACCC CCAAGTGCAT ATGGGTCTGT CAAAGCCTAT ACTAACTTTG ATGCTGAGCG GGATGCTTTG AACATTGAAA CAGCCATCAA 300
GACCAAAGGT GTGGATGAGG TCACCATTGT CAACATTTTG ACCAACCGCA GCAATGCACA GAGACAGGAT ATTGCCTTCG CCTACCAGAG AAGACCAA 400
AAGGAACTTG CATCAGCACT GAAGTCAGCC TTATCTGGC ACCTGGAGAC GGTGATTTTG GGCCTATTGA AGACACCTGC TCAGTATGAC GCTTCTGAGC 500
TAAAAGCTTC CATGAAGGGG CTGGGAACCG ACGAGGACTC TCTCATTTAG ATCATCTGCT CCAGAACCAA CCAGGAGCTG CAGGAAATTA ACAGAGTCTA 600
CAAGGAAATG TACAAGACTG ATCTGGAGAA GGACATTATT TCGGACACAT CTGGTGACTT CCGCAAGCTG ATGTTTGCCC TGGCAAAGGG TAGAAGAGCA 700
GAGGATGGCT CTGTCATTGA TTATGAAGTG ATTGACCAAG ATGCTCGGGA TCTCTATGAC GCTGGAGTGA AGAGGAAAGG AACTGATGTT CCCAAGTGGG 800
TCAGCATCAT GACCGAGCGG AGCGTGCCCC ACCTCCAGAA AGTATTTGAT AGGTACAAGA GTTACAGCCC TTATGACATG TTGAAAGCA TGAGGAAAGA 900
GGTTAAAGGA GACCTGGAAA ATGCTTTCCCT GAACCTGGTT CAGTGCATTC AGAACAAGCC CCTGTATTTT GCTGATCGGC TGTATGACTC CATGAAGGGC 1000
AAGGGGACGC GAGATAAGGT CCTGATCAGA ATCATGGTCT CCGCAGTGA AGTGGACATG TTGAAATTA GGTCTGAATT CAAGAGAAAG TACGGCAAGT 1100
CCCTGTACTA TTATATCCAG CAAGACACTA AGGGCGACTA CCAGAAAGCG CTGCTGTACC TGTGGGTGG AGATGACTGA AGCCGACAC GGCCGTAGCG 1200
TCCAGAAATG GTGCTCACCA TGCTCCAGC TAACAGGTCT AGAAAACCGC CTTGCGAATA ACAGTCCCCG TGGCCATCCC TGTGAGGGTG ACGTTAGCAT 1300
TACCCCAAC CTCATTTTAG TTGCCTAAGC ATTGCTGGC CTTCCTGTCT AGTCTCTCCT GTAAGCCAAA GAAATGAACA TTCCAAGGAG TTGGAAAGTGA 1400
AGTCTATGAT GTGAAACACT TTGCCCTCTG TGTACTGTGT CATAAACAGA TGAATAAACT GAATTTGTAC A 1471
```

**B**

Mouse Anxa2  
QGRS sequences found

| Position | Length | QGRS                             | G-score |
|----------|--------|----------------------------------|---------|
| 351      | 25     | <b>GGCCACCTGGAGACGGTGATTTTGG</b> | 18      |
| 432      | 19     | <b>GGCCTGGGGACTGACGAGG</b>       | 13      |
| 678      | 17     | <b>GGGGTGAAGAGGAAAGG</b>         | 15      |
| 815      | 17     | <b>GGTCAAAGGGGACCTGG</b>         | 16      |
| 912      | 22     | <b>GGCAAGGGGACTCGAGACAAGG</b>    | 10      |
| 1080     | 18     | <b>GGTGGGGATGACTGAAGG</b>        | 12      |

human Anxa2  
QGRS sequences found

| Position | Length | QGRS                                  | G-score |
|----------|--------|---------------------------------------|---------|
| 12       | 28     | <b>GGGGACGCTCTCAGCTCTCGGCACCGG</b>    | 6       |
| 437      | 25     | <b>GGCCACCTGGAGACGGTGATTTTGG</b>      | 18      |
| 517      | 20     | <b>GGGGCTGGGAACCGACGAGG</b>           | 12      |
| 625      | 30     | <b>GGAGAAGGACATTATTTCCGACACATCTGG</b> | 15      |
| 682      | 27     | <b>GGCAAAGGGTGAAGAGCAGAGGATGG</b>     | 11      |
| 894      | 24     | <b>GGAAAGAGGTTAAAGGAGACCTGG</b>       | 20      |
| 997      | 23     | <b>GGCAAGGGGACGCGAGATAAGG</b>         | 10      |

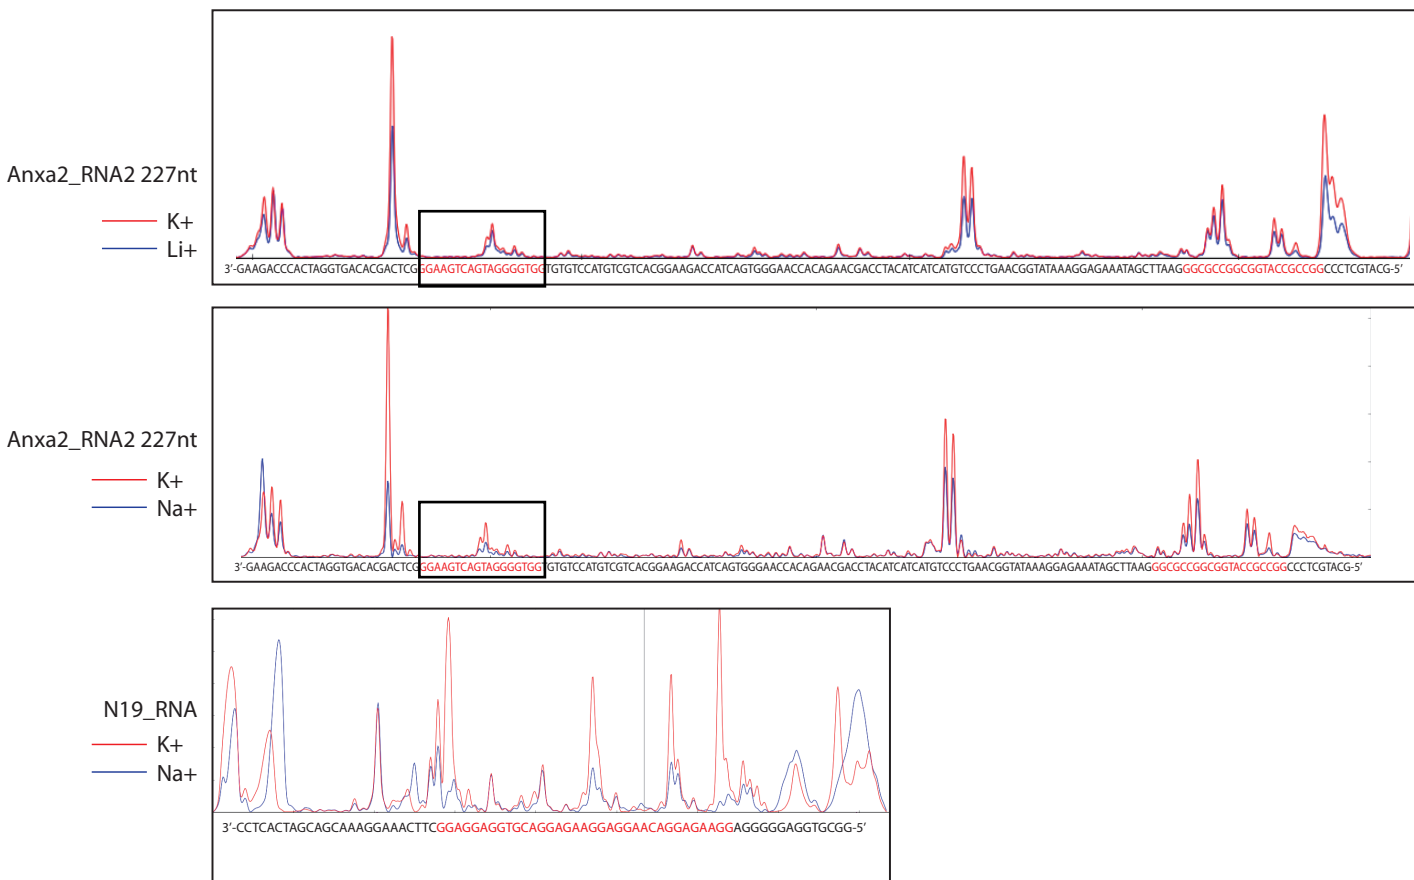

Supplemental Figure 2

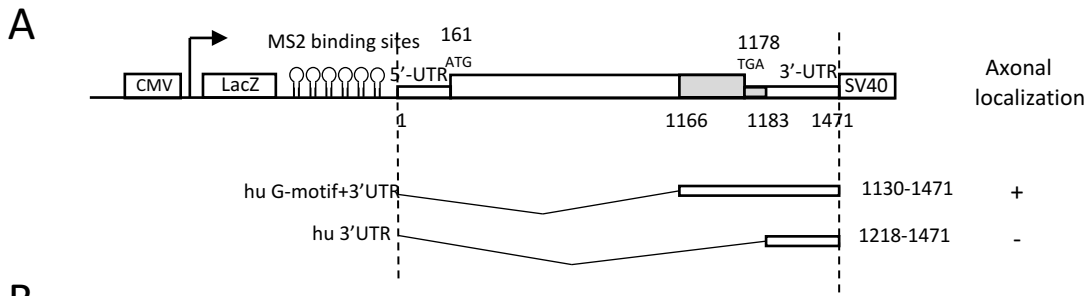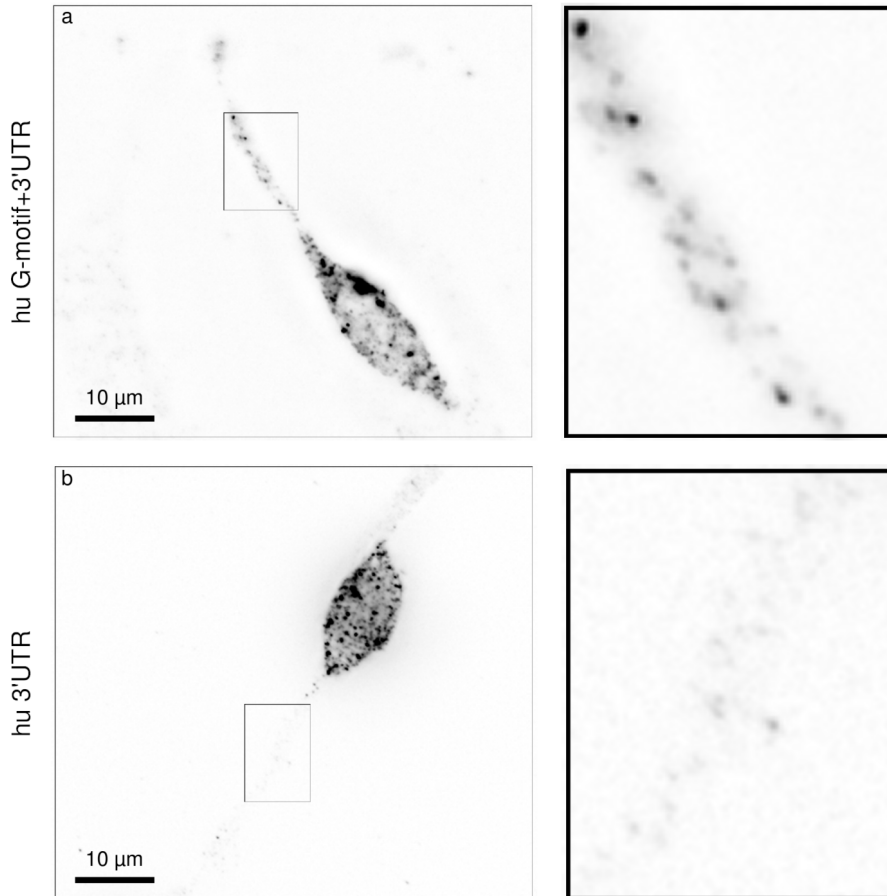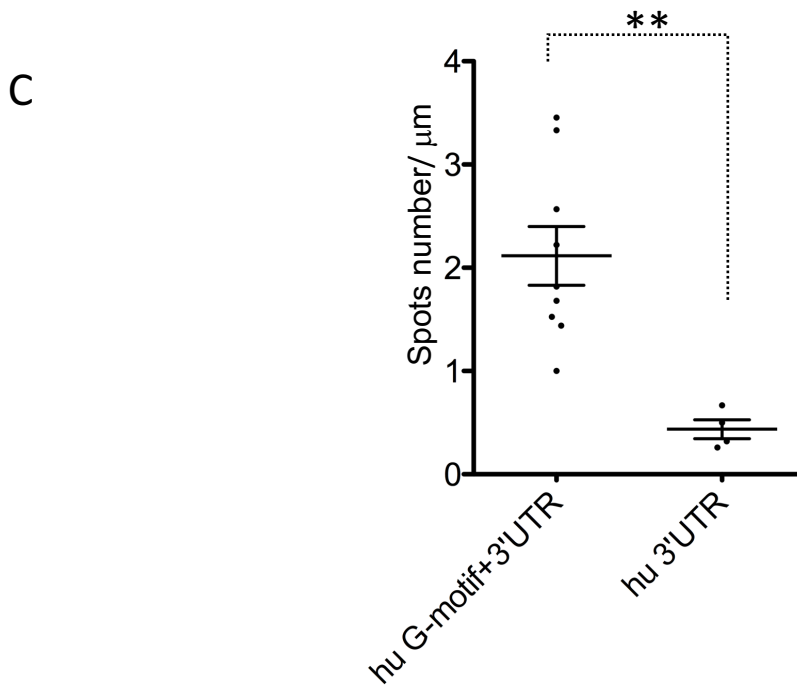

A

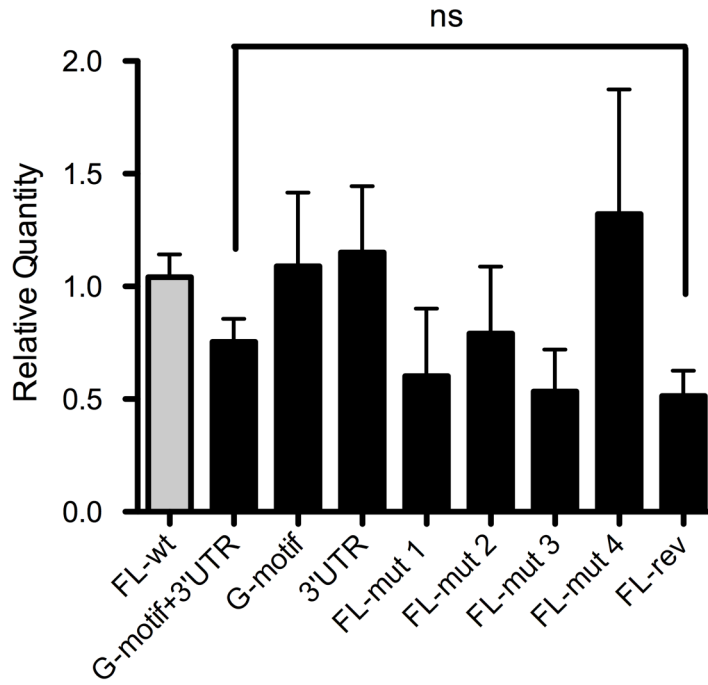

B

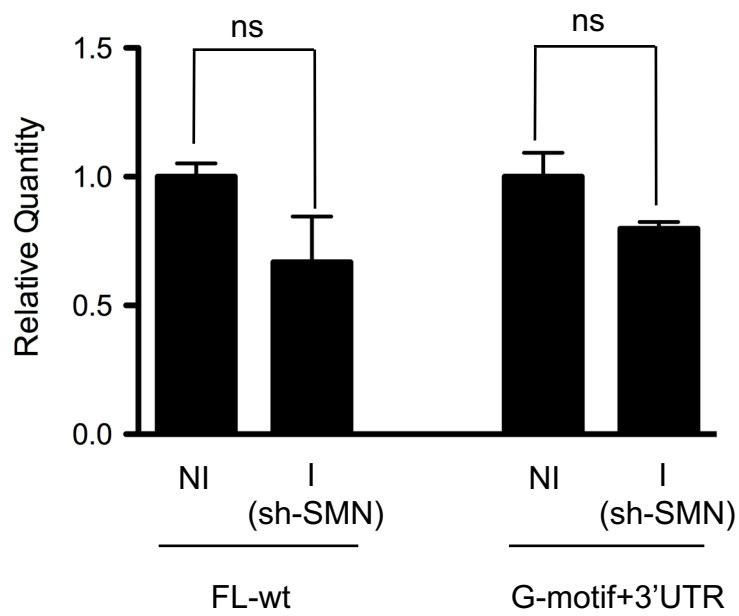

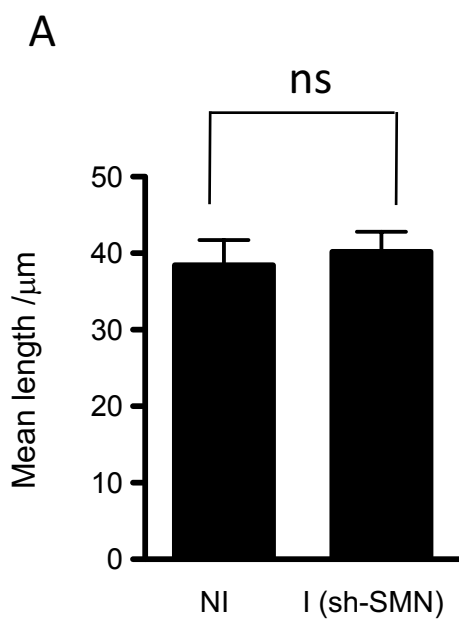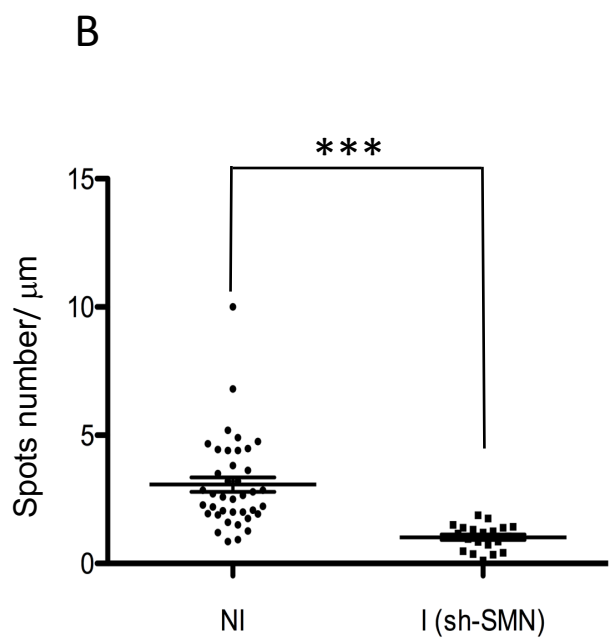

Supplement: supp_056788.116_Supplemental_Figures.pdf [file supp_056788.116_Supplemental_Figures.pdf]
